# Supplementary material
Source: ML conference proceedings conference paper supplement (https://openreview.net/forum?id=Od6CHhPM7I)

Great White  
↓  
Killer Whale

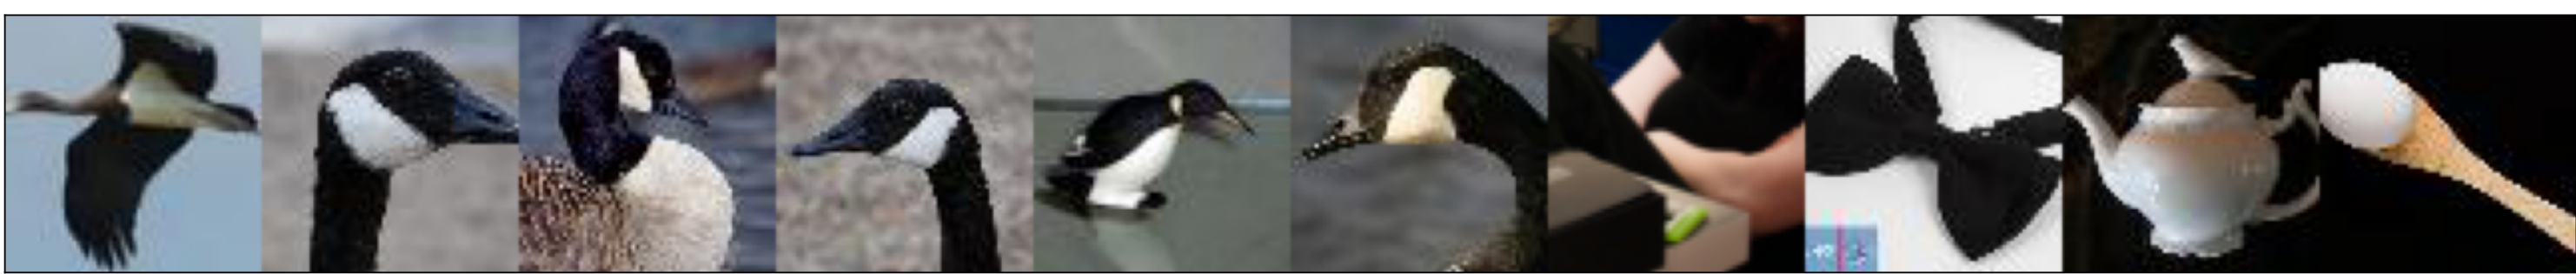

House Finch  
↓  
Goldfinch

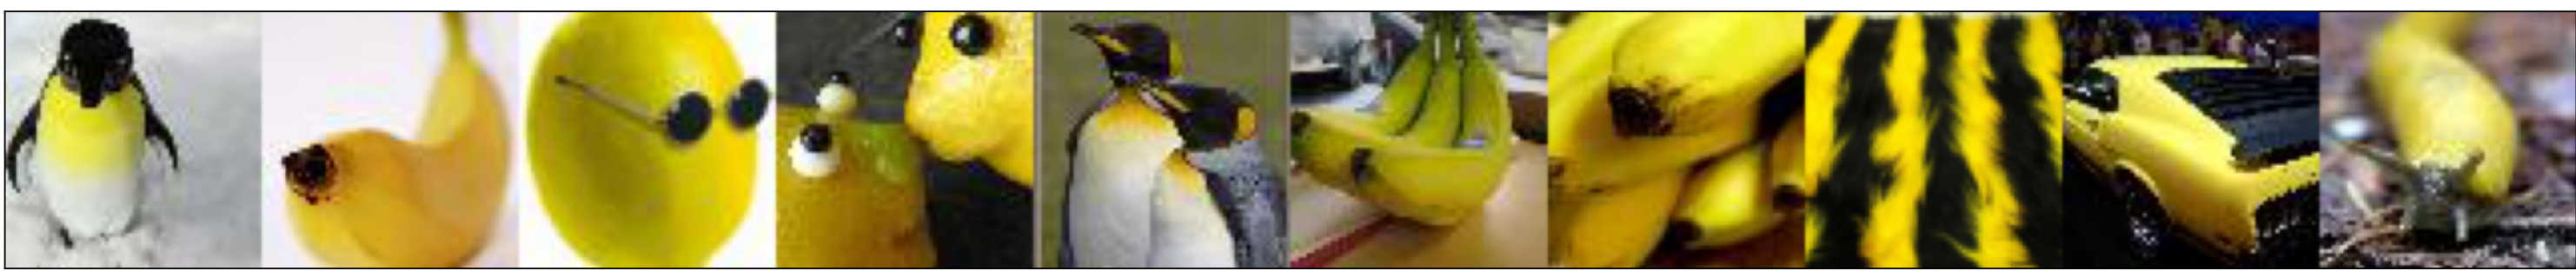

Indigo Bunting  
↓  
Jay

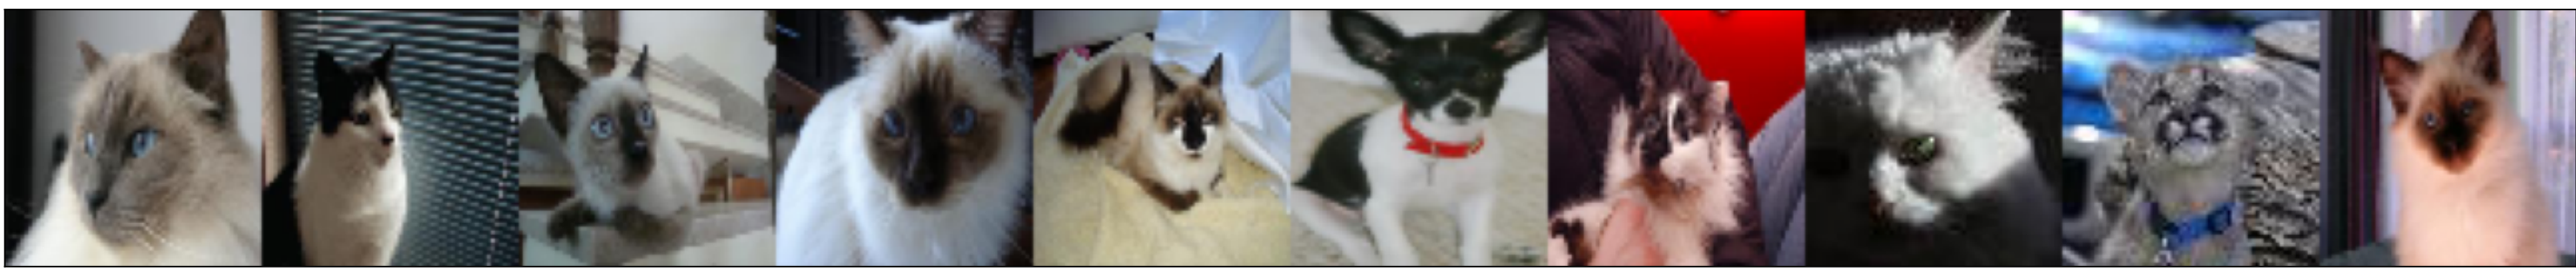

Brain Coral  
↓  
Rock Beauty

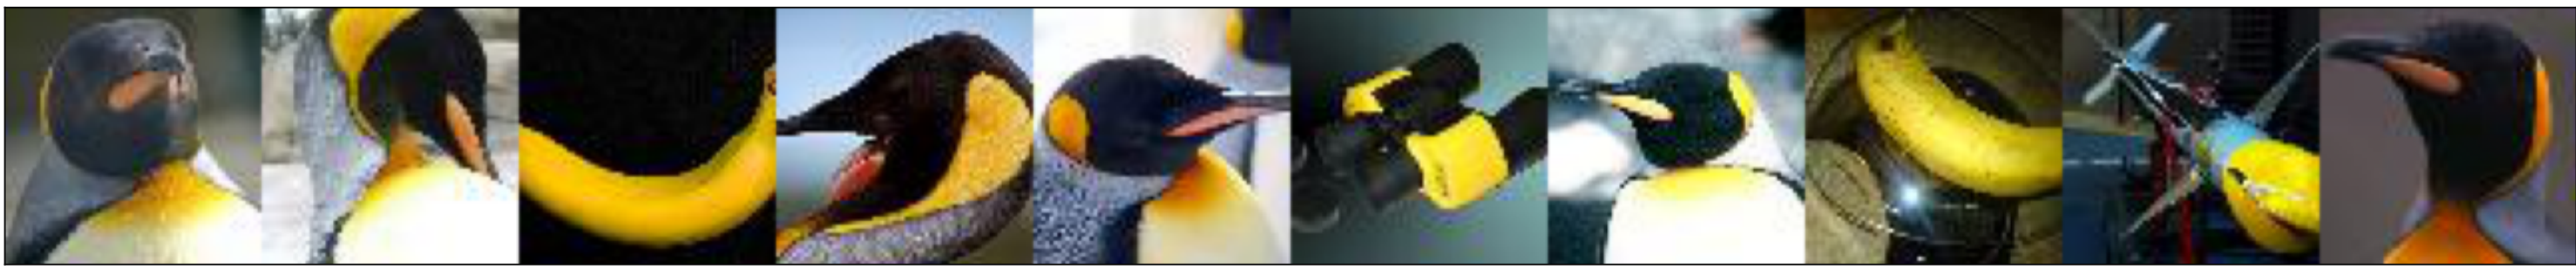

Golden Retriever  
↓  
Tennis Ball

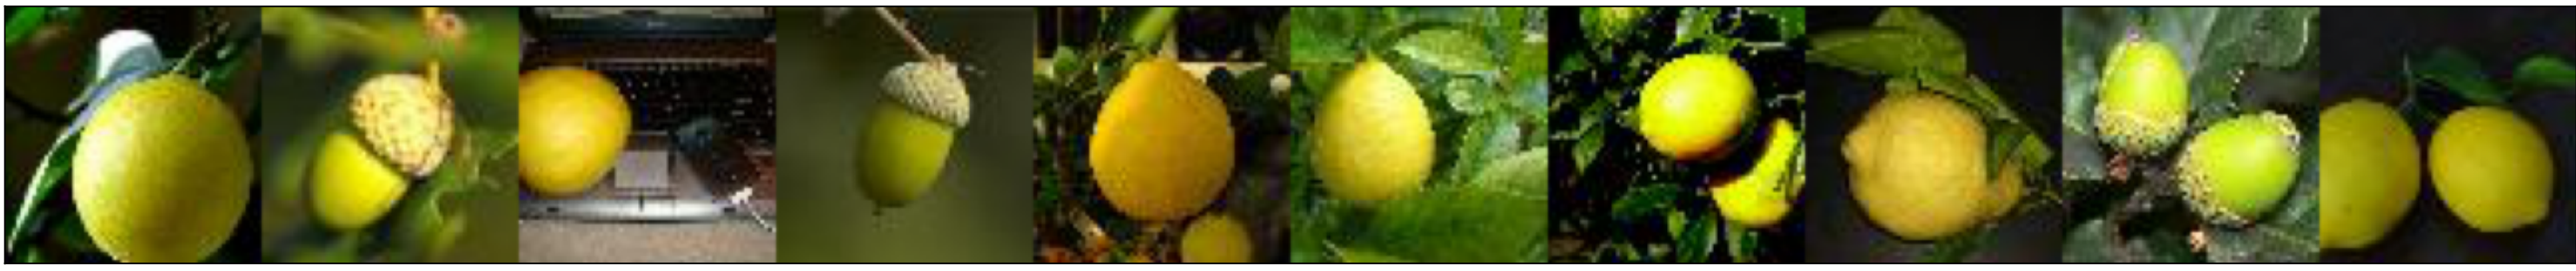

Cicada  
↓  
Bee

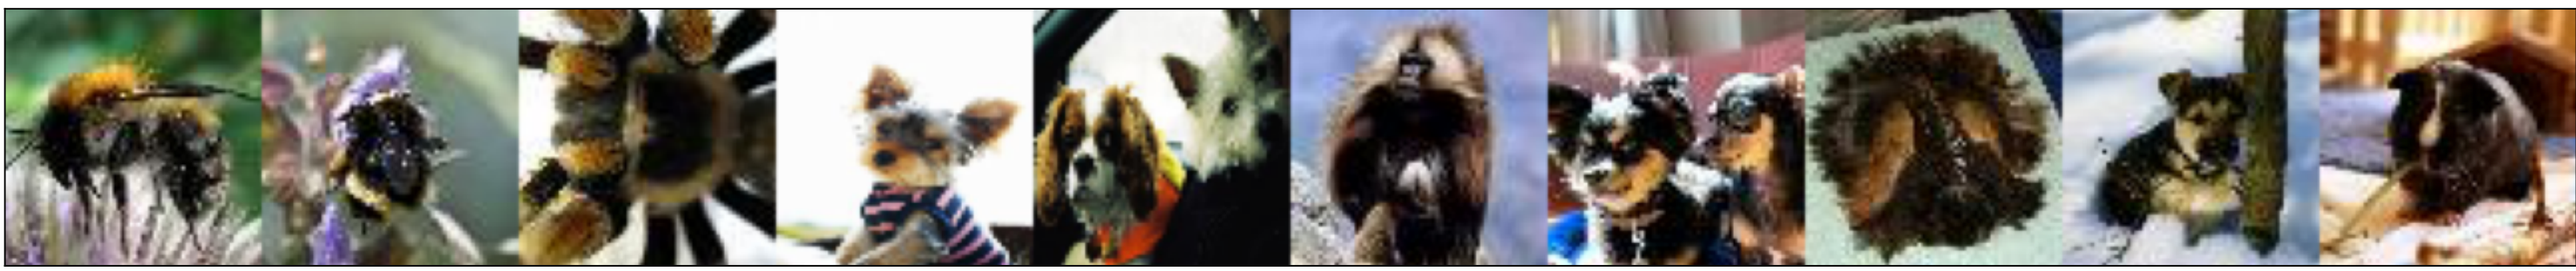

Bulbul  
↓  
Hummingbird

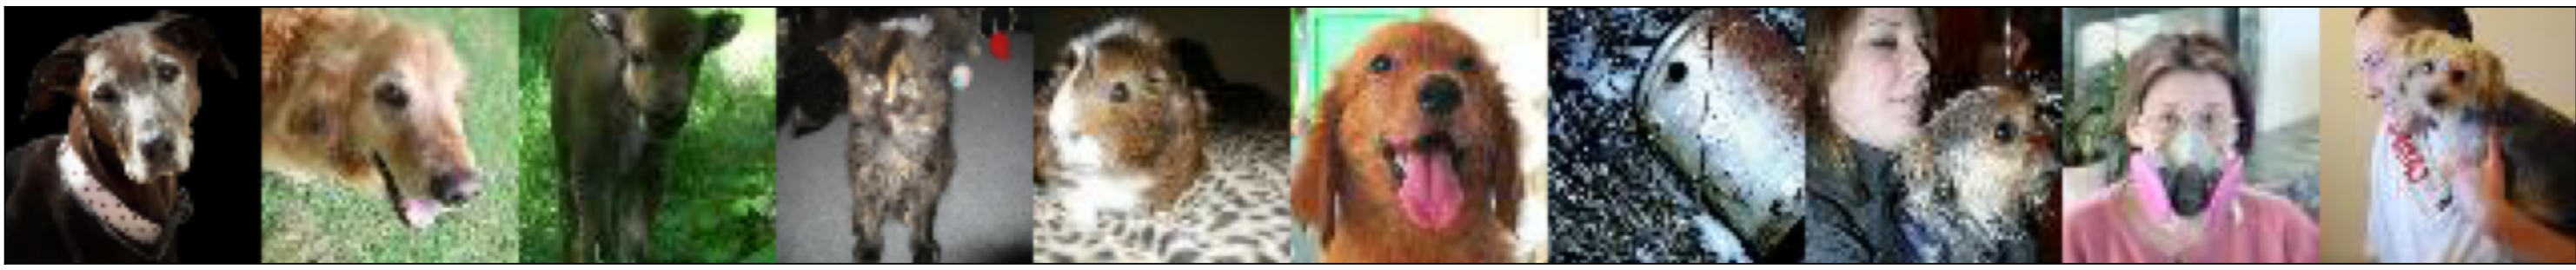

Ground Beetle  
↓  
Leaf Beetle

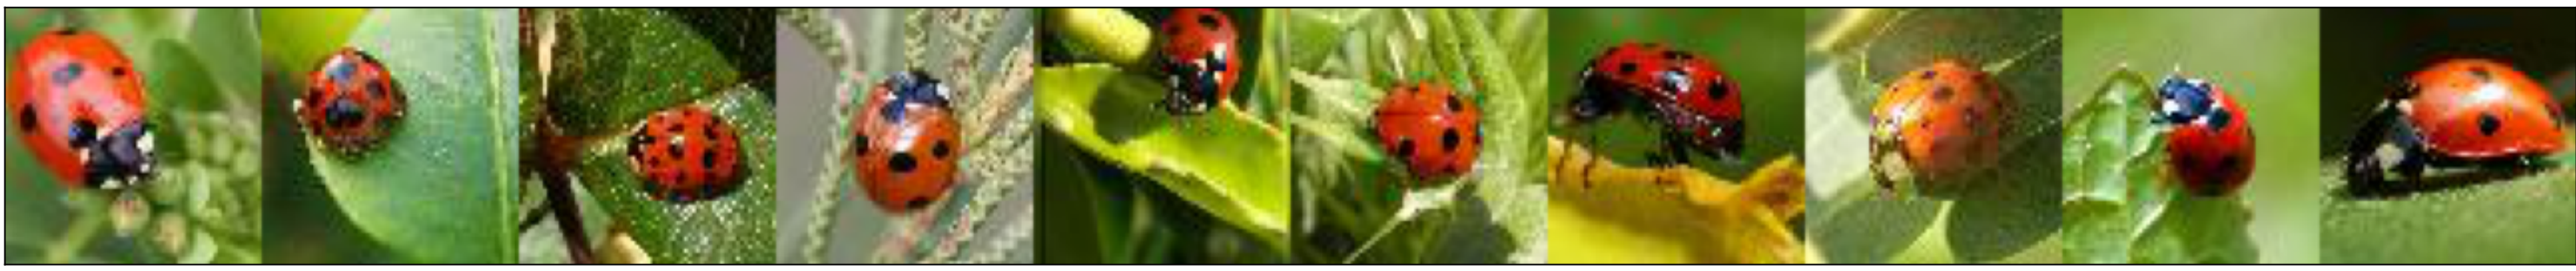

Drum  
↓  
Gong

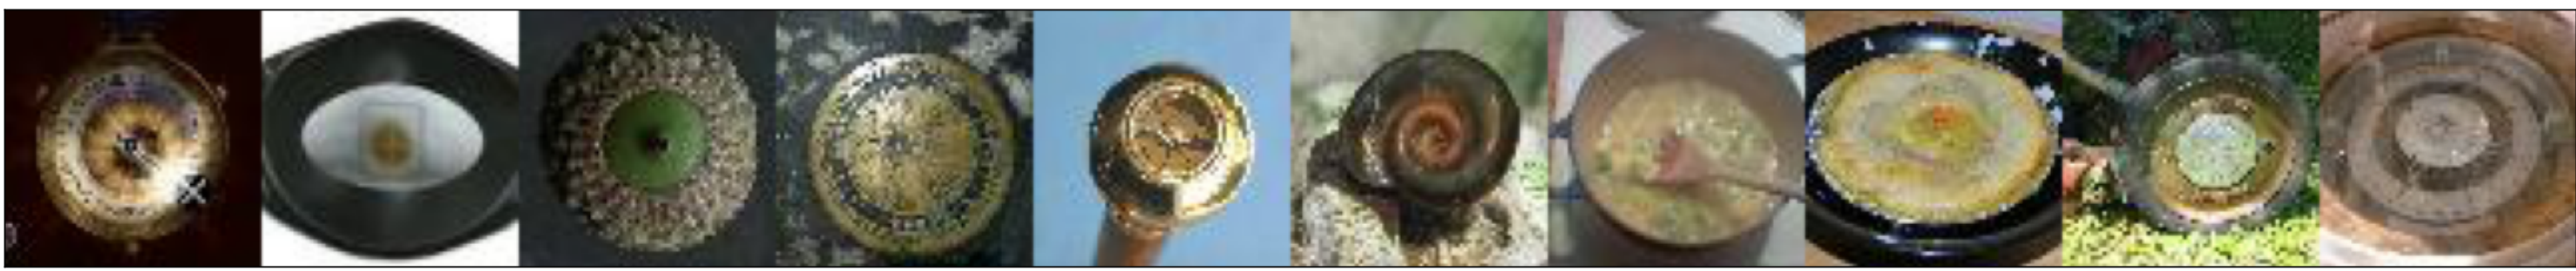

Envelope  
↓  
Carton

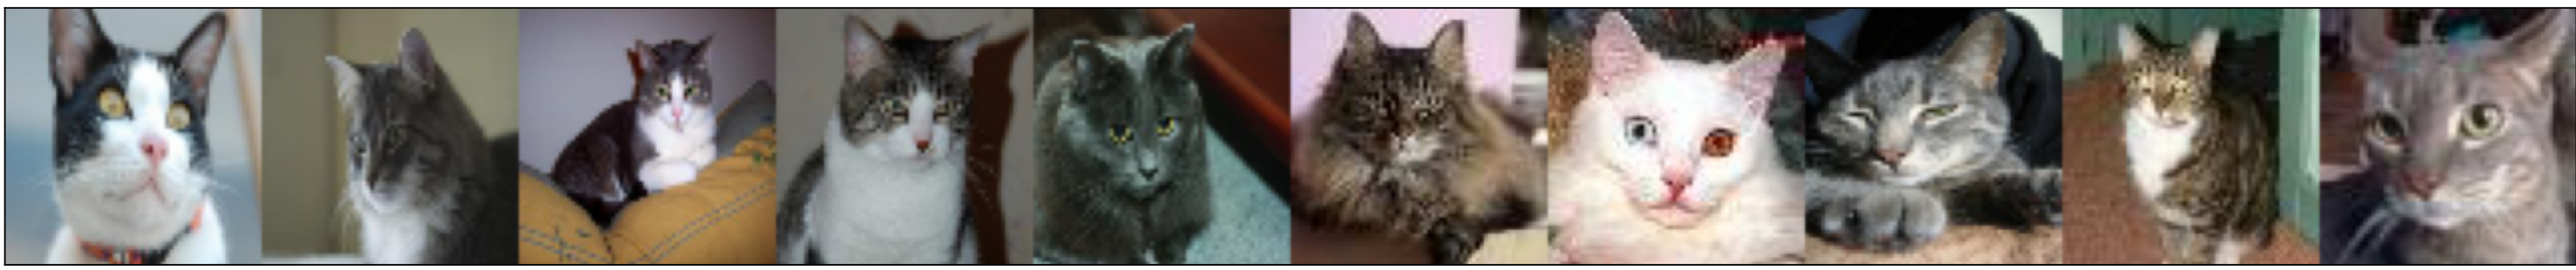

Walking Stick  
↓  
Green Lizard

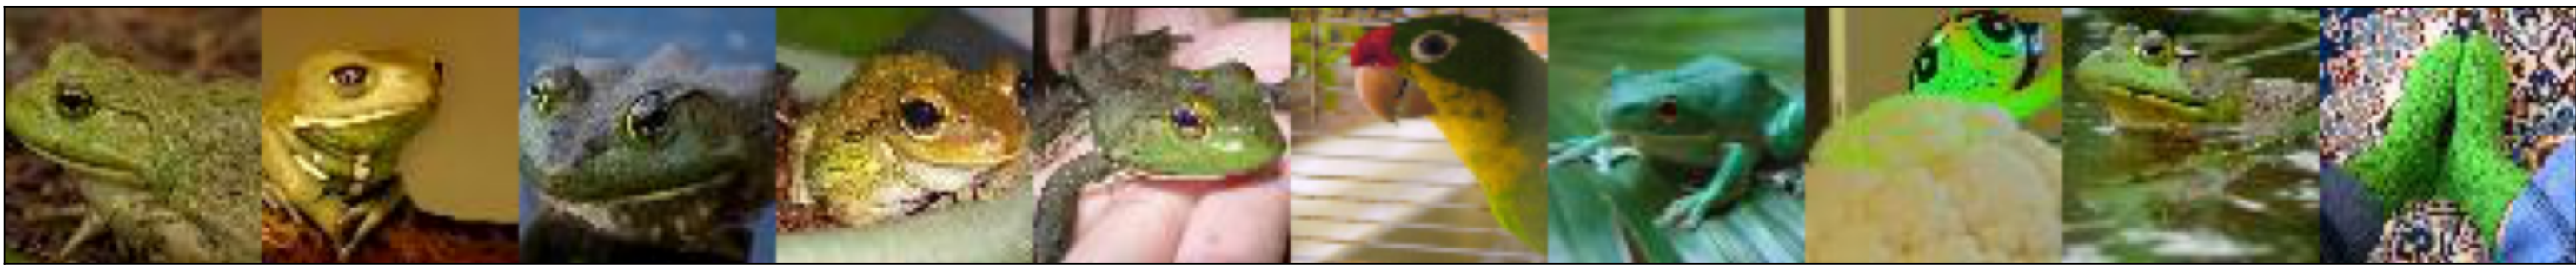

Thunder Snake  
↓  
Ringneck Snake

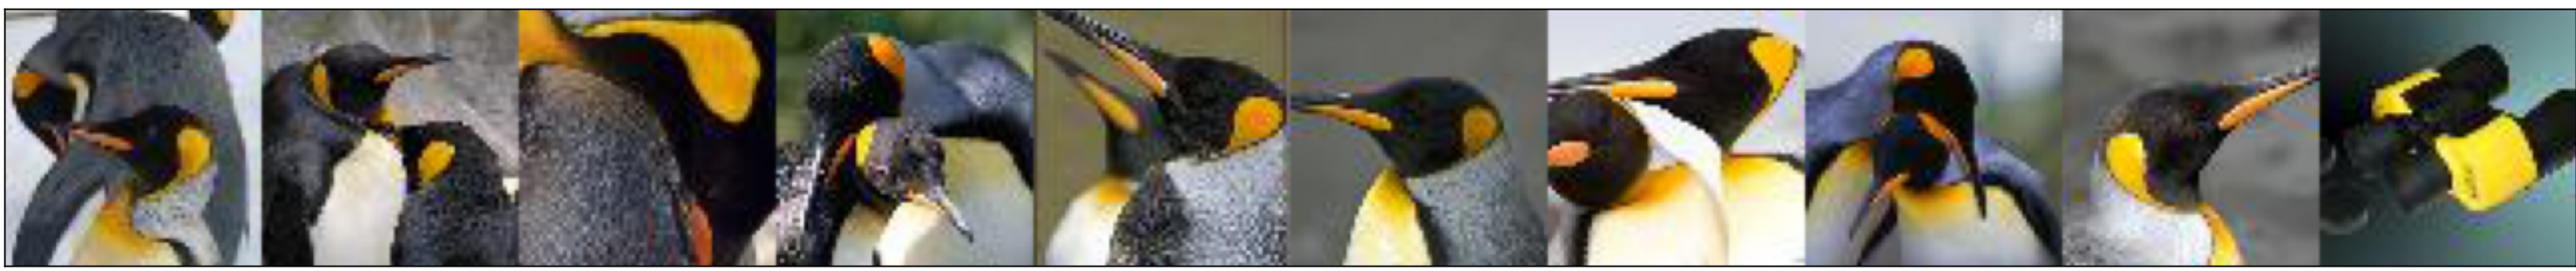

Bee  
↓  
Apiary

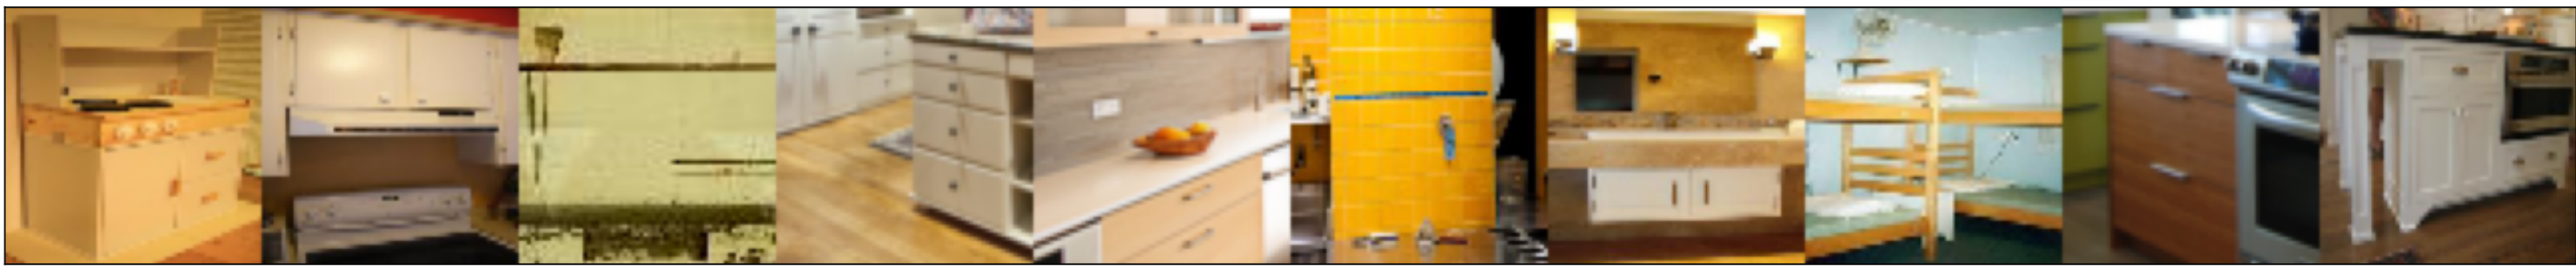

Slug  
↓  
Snail

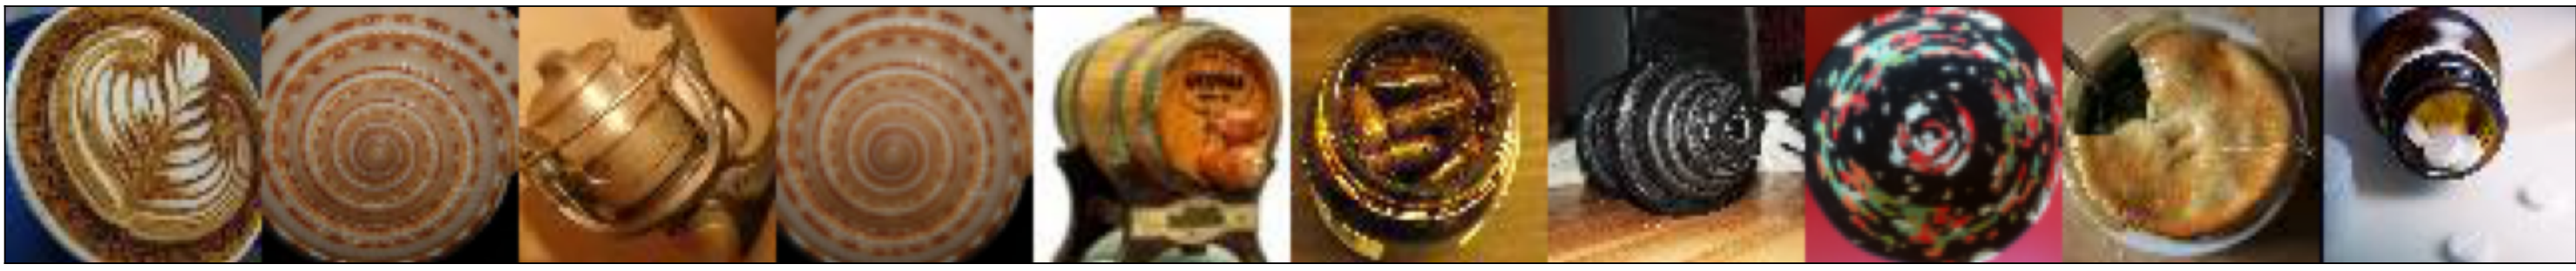

Dowitcher  
↓  
Redshank

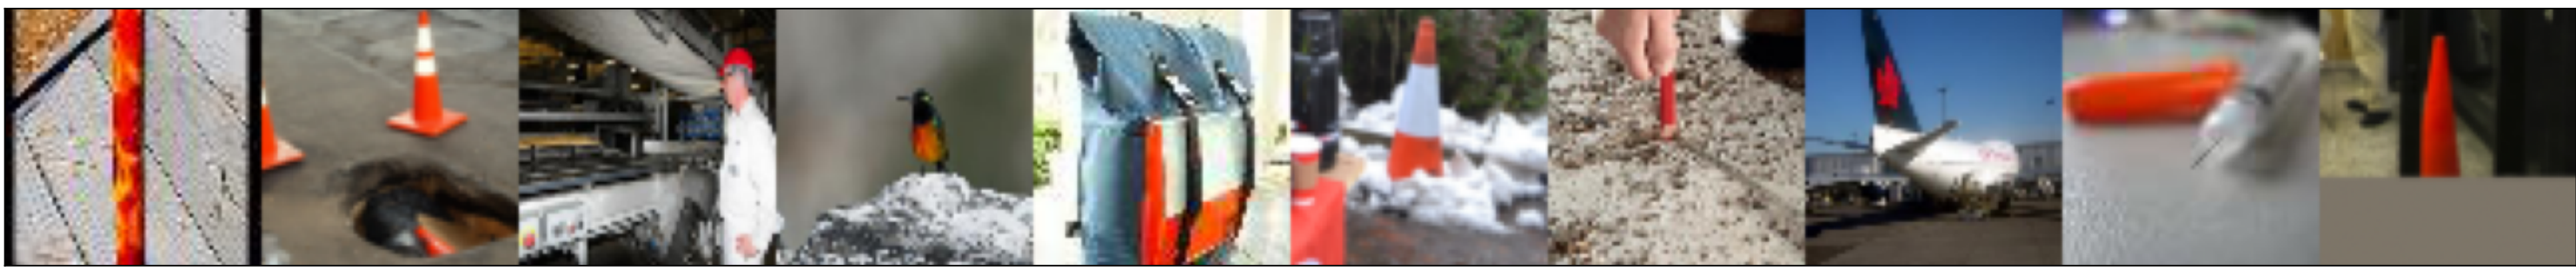

Supplement: supplementary_material [file attachment]
