# Supplementary material
Source: ML conference proceedings conference paper supplement (https://openreview.net/forum?id=Od6CHhPM7I)

### (a) Make Synthetic Adversaries

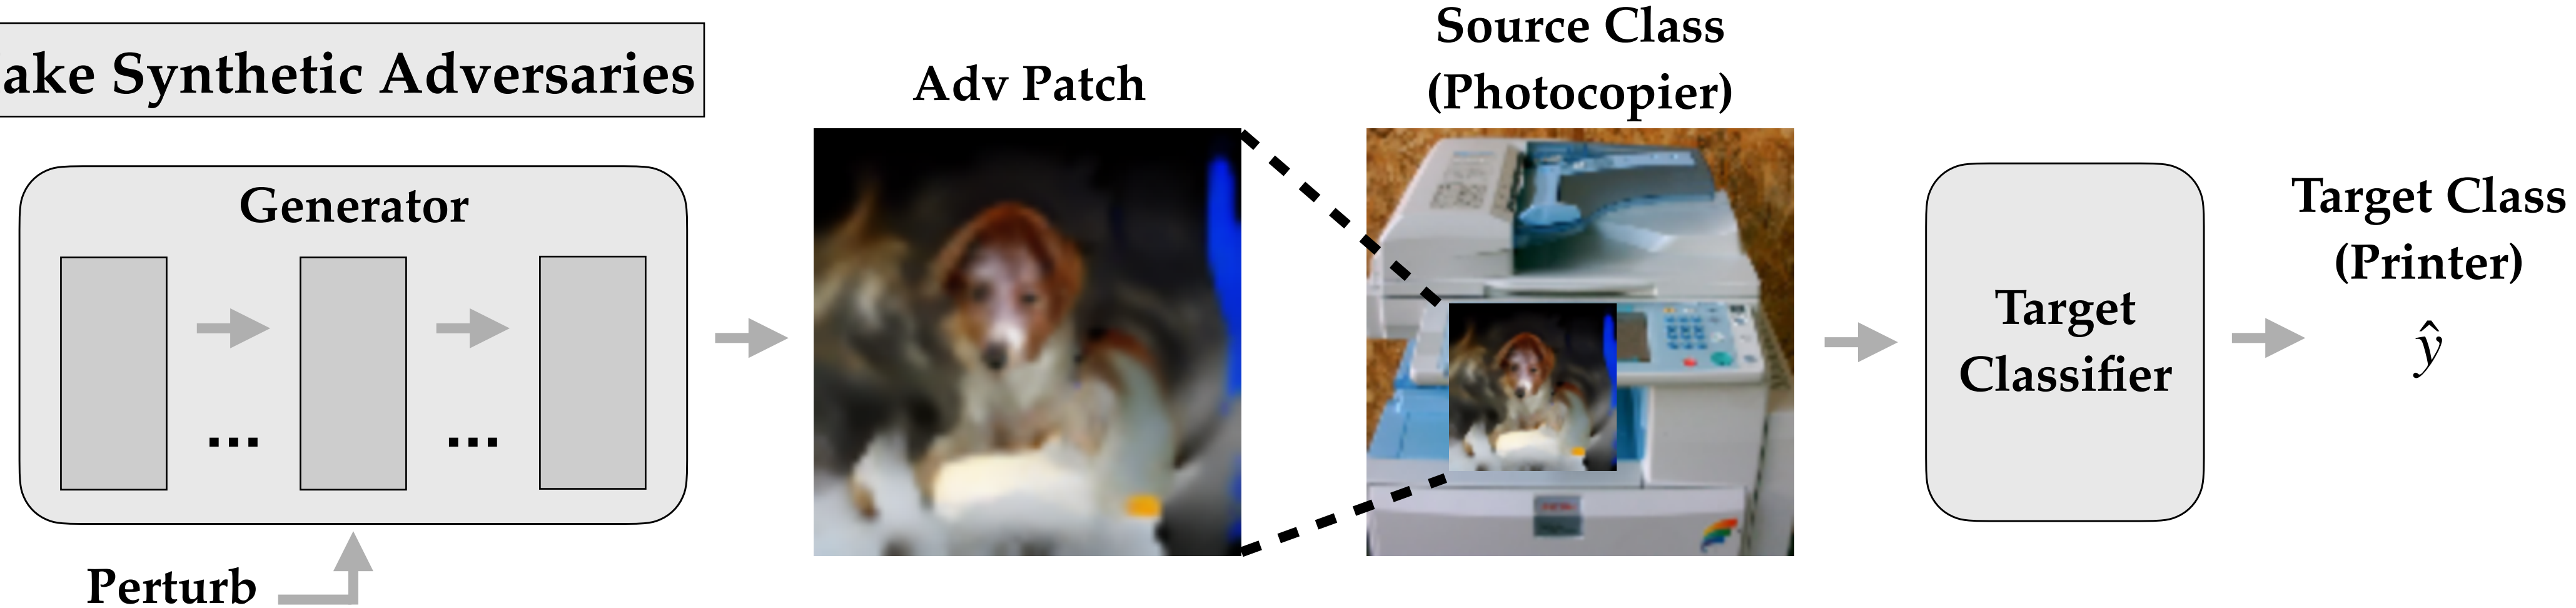

### (b) Find Similar Natural Adversaries

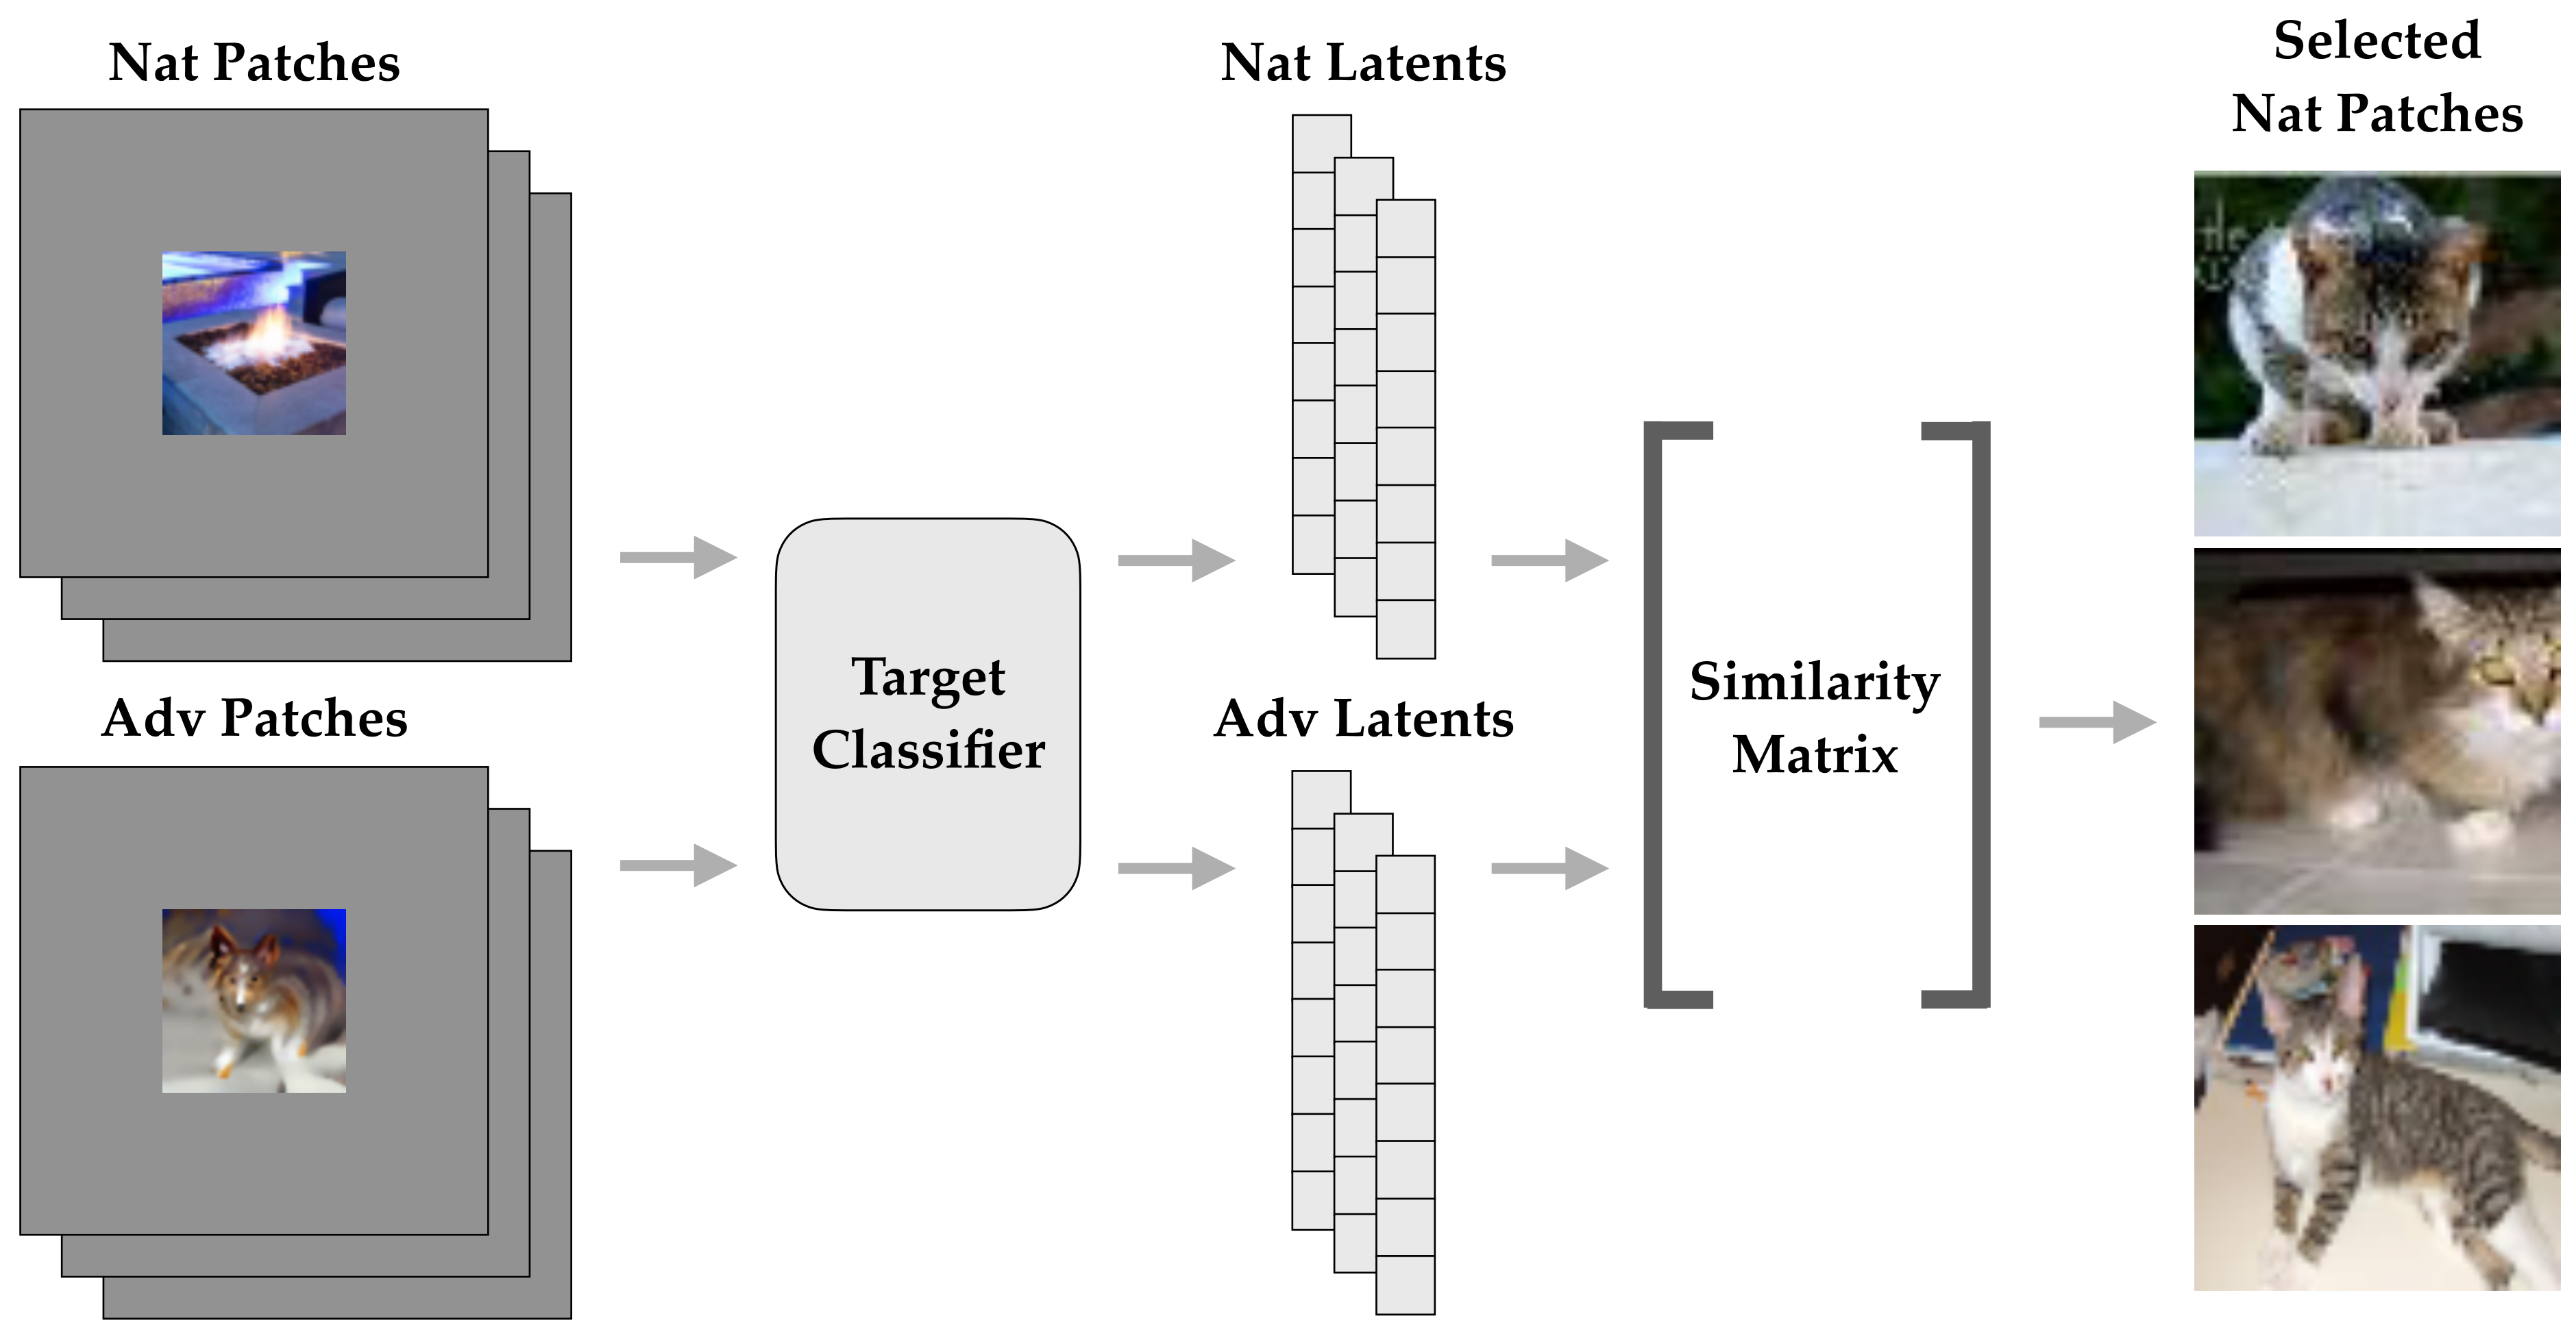

Supplement: supplementary_material [file attachment]
